# Supplementary material
Source: Elsevier journal article supplement (https://www.sciencedirect.com/science/article/pii/S2254887420300254)
Supplement: mmc1 [file S2254887420300254:mmc1.pdf]

**Tabla S1. Cuestionario Delphi.**

|                                                                                                                                                                                                                                                                                                                                                                                                                                                                                                              |
|--------------------------------------------------------------------------------------------------------------------------------------------------------------------------------------------------------------------------------------------------------------------------------------------------------------------------------------------------------------------------------------------------------------------------------------------------------------------------------------------------------------|
| <b>A. Definición y percepción del paciente con IC-FER «estable»</b>                                                                                                                                                                                                                                                                                                                                                                                                                                          |
| <b>A1.1. Definición de IC-FER</b>                                                                                                                                                                                                                                                                                                                                                                                                                                                                            |
| <b>1)</b> IC-FER: Diagnóstico clínico de IC y FEVI $\leq 40$ %. Siendo la IC un síndrome clínico complejo que resulta de cualquier deterioro estructural o funcional del llenado ventricular o de la eyección de sangre. Las manifestaciones cardinales de la IC son la disnea y la fatiga, que pueden limitar la tolerancia al ejercicio, y la retención de líquidos, que pueden conducir a congestión pulmonar y/o esplácica y/o edema periférico. (Guías ACA/AHA/HFSA).                                   |
| <b>2)</b> IC-FER: Diagnóstico clínico de IC y una FEVI $\leq 40$ %. Siendo la IC un síndrome clínico caracterizado por síntomas típicos (como disnea, inflamación de tobillos y fatiga), que puede ir acompañado de signos (como presión venosa yugular elevada, crepitantes pulmonares y edema periférico) causados por una anomalía cardíaca estructural o funcional que producen una reducción del gasto cardíaco o una elevación de las presiones intracardiacas en reposo o en estrés. (Guía ESC 2016). |
| <b>A1.2. Definición de paciente IC-FER «estable»</b>                                                                                                                                                                                                                                                                                                                                                                                                                                                         |
| <b>1)</b> En un paciente con IC crónica, el término <i>estabilidad</i> suele hacer referencia a que los síntomas y signos son inexistentes o leves y que no han cambiado recientemente o al menos en el mes anterior, o desde la última visita médica de acuerdo con la práctica clínica.                                                                                                                                                                                                                    |
| <b>2)</b> Los pacientes con IC a menudo se consideran «clínicamente estables» si están recibiendo tratamiento y no muestran signos y síntomas físicos que sugieran un empeoramiento de la función cardíaca en al menos el último mes.                                                                                                                                                                                                                                                                        |
| <b>3)</b> Un paciente con IC «estable» se define como paciente con IC crónica cuya enfermedad no ha empeorado, la medicación para la IC no ha cambiado y no ha sido hospitalizado por IC.                                                                                                                                                                                                                                                                                                                    |
| <b>A2. IC-FER «estable» y práctica clínica habitual actual</b>                                                                                                                                                                                                                                                                                                                                                                                                                                               |
| <b>1)</b> La naturaleza silenciosa pero progresiva de la IC-FER puede contribuir a aumentar el riesgo de muerte en pacientes que son asintomáticos o sólo ligeramente sintomáticos.                                                                                                                                                                                                                                                                                                                          |
| <b>2)</b> Las calculadoras de riesgo desarrolladas recientemente tienen en cuenta los tratamientos de última generación y los niveles de biomarcadores y revelan que no existe una IC verdaderamente estable.                                                                                                                                                                                                                                                                                                |
| <b>3)</b> La IC-FER es un trastorno progresivo por el cual la estructura y la función cardíaca continúan deteriorándose, a menudo a pesar de la ausencia de signos y síntomas clínicamente aparentes de un estado de empeoramiento de la enfermedad.                                                                                                                                                                                                                                                         |
| <b>4)</b> Los pacientes con IC sintomática en algún momento (estadio C de la clasificación ACC/AHA) que no presenten síntomas y signos durante la visita clínica no tienen un riesgo considerable de muerte.                                                                                                                                                                                                                                                                                                 |
| <b>5)</b> La naturaleza silenciosa pero progresiva de la IC-FER no contribuye a aumentar el riesgo de muerte en pacientes que son «clínicamente estables».                                                                                                                                                                                                                                                                                                                                                   |
| <b>6)</b> El número de hospitalizaciones no se reducen si el paciente con IC-FER tiene un tratamiento optimizado.                                                                                                                                                                                                                                                                                                                                                                                            |

|                                                                                                                                                                                                                  |
|------------------------------------------------------------------------------------------------------------------------------------------------------------------------------------------------------------------|
| 7) El paciente con IC-FER «estable» es excepcional que tenga ingresos hospitalarios a corto/medio plazo.                                                                                                         |
| 8) Los pacientes con clases 1 y 2 de la NYHA presentan el riesgo más bajo de sufrir muerte súbita cardíaca.                                                                                                      |
| 9) El paciente con IC-FER «estable», independientemente de si presenta alguna descompensación, tiene un alto riesgo de hospitalizaciones.                                                                        |
| 10) Un paciente con IC-FER «estable» que está en tratamiento con diuréticos es un indicador de alto riesgo.                                                                                                      |
| <b>B. Manejo del paciente con IC-FER «estable»</b>                                                                                                                                                               |
| <b>B1. Evaluación y seguimiento del paciente con IC-FER «estable» en la práctica clínica habitual actual</b>                                                                                                     |
| 1) En el seguimiento del paciente con IC-FER «estable» debe existir una colaboración total entre el cardiólogo y el médico de atención primaria.                                                                 |
| 2) El papel de enfermería es clave para fomentar la adherencia al tratamiento.                                                                                                                                   |
| 3) Disponer de una unidad de IC de referencia puede ser de utilidad en el manejo del paciente con IC-FER                                                                                                         |
| 4) El paciente con IC-FER de difícil control debe ser seguido en una unidad de IC.                                                                                                                               |
| 5) La clase funcional puede ser igual pero la IC-FER «estable» puede progresar.                                                                                                                                  |
| 6) Disponer de una unidad de cuidados paliativos puede ser de utilidad en el manejo del paciente con IC-FER.                                                                                                     |
| 7) En el manejo óptimo del paciente con IC-FER «estable» el médico de atención primaria es indispensable.                                                                                                        |
| 8) Para evaluar la progresión del paciente con IC-FER «estable» no basta solo con evaluar los signos y síntomas clínicos.                                                                                        |
| 9) El papel de enfermería es clave para detectar si los signos o síntomas de la IC-FER interfieren en la vida diaria del paciente.                                                                               |
| 10) En consulta, al paciente con IC-FER «estable» se debe consultar específicamente por cada signo y síntoma y su afectación a su calidad de vida.                                                               |
| 11) El paciente con IC-FER «estable» debe examinarse al menos cada 6 meses para evaluar si su enfermedad ha empeorado, si deberían cambiar de medicación o si se debería considerar otro tipo de procedimientos. |
| 12) El papel de enfermería es clave para detectar la necesidad de un cambio de tratamiento.                                                                                                                      |
| 13) La necesidad de añadir o aumentar la dosis de un diurético de ASA indica que el paciente deja de ser estable.                                                                                                |
| 14) En consulta no es necesario valorar si el paciente con IC-FER «estable» adapta su vida a medida que va reduciendo su capacidad física.                                                                       |
| 15) La resonancia magnética de corazón es una técnica imprescindible para evaluar si existe progresión de la IC-FER «estable».                                                                                   |
| 16) El médico de atención primaria no puede hacer un seguimiento riguroso ni detectar la progresión de la IC-FER «estable».                                                                                      |
| 17) Para evaluar la progresión del paciente con IC-FER «estable» no es necesario medir los niveles de biomarcadores, tales como péptidos natriuréticos.                                                          |
| 18) Cualquier paciente con insuficiencia cardíaca debe ser seguido en una unidad de insuficiencia cardíaca.                                                                                                      |

|                                                                                                                                                                                       |
|---------------------------------------------------------------------------------------------------------------------------------------------------------------------------------------|
| <b>19)</b> La clasificación funcional de la escala NYHA es una valoración objetiva.                                                                                                   |
| <b>20)</b> El test de los 6 minutos es de gran utilidad en la valoración clínica de los pacientes con insuficiencia cardíaca.                                                         |
| <b>21)</b> La concordancia respecto a la clase funcional de la NYHA basada en lo indicado por el médico y el paciente es inferior al 50 %.                                            |
| <b>22)</b> Para evaluar la progresión del paciente con IC-FER «estable» es necesario evaluar la persistencia o empeoramiento de disfunción sistólica severa del ventrículo izquierdo. |
| <b>23)</b> Para evaluar la progresión del paciente con IC-FER «estable» es necesario medir la fracción de eyección.                                                                   |
| <b>24)</b> El paciente con IC-FER «estable» puede ser seguido en atención primaria sin necesidad de ser visitado regularmente por un cardiólogo.                                      |
| <b>B2. Tratamiento del paciente con IC-FER «estable» en la práctica clínica habitual actual</b>                                                                                       |
| <b>1)</b> En cada visita, es primordial valorar la adherencia al tratamiento del paciente con IC-FER «estable».                                                                       |
| <b>2)</b> Independientemente de que el paciente con IC-FER se mantenga en la misma clase funcional el tratamiento farmacológico debe optimizarse.                                     |
| <b>3)</b> La terapia médica del paciente con IC-FER «estable» puede optimizarse con los nuevos avances científicos.                                                                   |
| <b>4)</b> La incorporación de nuevos fármacos en pacientes menos sintomáticos puede enlentecer la progresión subclínica de la enfermedad.                                             |
| <b>5)</b> Si el paciente con IC-FER presenta signos o síntomas leves persistentes que afectan su calidad de vida es necesario valorar un cambio de tratamiento.                       |
| <b>6)</b> Independientemente de que el paciente con IC-FER esté «estable» el tratamiento farmacológico debe titularse a dosis objetivo.                                               |
| <b>7)</b> En caso que el paciente con IC-FER se mantuviera sintomático a pesar de las dosis máximas toleradas sería necesario cambiar de tratamiento.                                 |
| <b>8)</b> La necesidad de añadir o aumentar un diurético indica que el paciente deja de estar estable.                                                                                |
| <b>9)</b> El cambio de un IECA o un ARA II a un INRA no debe reservarse hasta que aparezca una descompensación clínica.                                                               |
| <b>10)</b> El tratamiento del paciente con IC-FER «estable» con INRA sólo está justificado cuando hay un empeoramiento de la clase funcional.                                         |
| <b>11)</b> Si el paciente con IC-FER presenta signos o síntomas leves persistentes no es necesario valorar un cambio de tratamiento.                                                  |
| <b>12)</b> Optimizar el tratamiento es exclusivamente titular a dosis máxima tolerada.                                                                                                |
| <b>13)</b> Si el paciente con IC-FER no presenta signos o síntomas no es necesario valorar un cambio de tratamiento.                                                                  |
| <b>14)</b> Las diferentes comorbilidades que puede padecer el paciente con IC-FER «estable» no limitan el tratamiento idóneo.                                                         |
| <b>15)</b> En el tratamiento del paciente con IC-FER «estable» debe primar la experiencia a las recomendaciones de las guías.                                                         |
| <b>B3. Abordaje en consulta del paciente con IC-FER «estable» en la práctica clínica habitual actual</b>                                                                              |
| <b>1)</b> Preguntar específicamente sobre si el paciente con IC-FER «estable» siente más o menos fatiga que la visita anterior.                                                       |
| <b>2)</b> Sondear específicamente sobre si el paciente con IC-FER «estable» ha reducido su actividad o ha dejado de hacer alguna actividad.                                           |
| <b>3)</b> Preguntar específicamente sobre si el paciente con IC-FER «estable» se ahoga más o menos por la noche que la visita anterior.                                               |
| <b>4)</b> Consultar específicamente sobre si el paciente con IC-FER «estable» se cansa más o menos que la visita anterior.                                                            |

|                                                                                                                                      |
|--------------------------------------------------------------------------------------------------------------------------------------|
| 5) Consultar específicamente sobre si el paciente con IC-FER «estable» ha retenido líquidos.                                         |
| <b>B4. Recomendaciones de abordaje en el paciente con IC-FER «estable». en la práctica clínica habitual</b>                          |
| 1) Fomentar y comprobar la adherencia al tratamiento.                                                                                |
| 2) Revisar la necesidad de modificar el tratamiento.                                                                                 |
| 3) Recomendar control de peso, si procediera.                                                                                        |
| 4) Promover hábitos saludables con medidas de autocuidado (presión arterial y frecuencia cardíaca).                                  |
| 5) Estimular la actividad física adecuada al paciente con IC.                                                                        |
| 6) Recomendar vacunación antigripal anual.                                                                                           |
| 7) Recomendar vacunación antineumocócica.                                                                                            |
| <b>C. Recomendaciones para optimizar el manejo y seguimiento del paciente con IC-FER «estable»</b>                                   |
| <b>C1. Recomendaciones basadas en la experiencia clínica en pacientes con IC-FER «estable»</b>                                       |
| 1) Es necesario concienciar sobre la necesidad de la optimización del tratamiento del paciente con IC-FER «estable».                 |
| 2) El profesional sanitario debe estar al día de los últimos avances terapéuticos.                                                   |
| 3) Es necesario concienciar sobre la progresión de la IC-FER «estable».                                                              |
| 4) Se debe promover la continuidad asistencial y la coordinación entre cardiología y atención primaria.                              |
| 5) El profesional sanitario debe contar con herramientas útiles de evaluación de progresión de la IC-FER.                            |
| 6) Se debe formar al profesional sanitario en relación a la identificación de la progresión de la IC-FER.                            |
| 7) Se debe formar al paciente en la importancia de la adherencia al tratamiento para la IC-FER.                                      |
| 8) Es necesario sensibilizar al profesional sanitario sobre el seguimiento de las guías de manejo del paciente con IC-FER «estable». |
| 9) La entrevista clínica entre el profesional sanitario y el paciente con IC-FER debería estar protocolizada.                        |

ACC/AHA: American College of Cardiology/American Heart Association. ARA II: antagonistas del receptor de la angiotensina II. FEVI: fracción de eyección del ventrículo izquierdo. IC: Insuficiencia cardiaca. IC-FER: insuficiencia cardiaca con fracción de eyección reducida. IECA: inhibidor de la enzima de conversión de la angiotensina. INRA: inhibidor de la neprilina y del receptor de la angiotensina. NYHA: New York Heart Association.

**Tabla S2. Caracterización de la práctica clínica habitual de los panelistas participantes.**

|                                           | Porcentaje ( <i>n</i> = 150) |
|-------------------------------------------|------------------------------|
| <b>Actividad médica principal*</b>        |                              |
| Cardiología clínica                       | 100 %                        |
| Imagen cardiaca                           | 18,7 %                       |
| Arritmias                                 | 3,3 %                        |
| Hemodinámica                              | 3,3 %                        |
| Otras                                     | 2,0 %                        |
| <b>Años de ejercicio</b>                  |                              |
| 2-5                                       | 15,3 %                       |
| >5-10                                     | 22,7 %                       |
| >10-15                                    | 22,7 %                       |
| >15-20                                    | 15,3 %                       |
| >20                                       | 24,0 %                       |
| <b>Lugar de trabajo</b>                   |                              |
| Centro Primario                           | 5,3 %                        |
| Centro Secundario                         | 36,0 %                       |
| Centro Terciario                          | 58,7 %                       |
| <b>Lugar de atención de los pacientes</b> |                              |
| En consulta dentro del hospital           | 54,0 %                       |
| En consulta fuera del hospital            | 13,3 %                       |
| Ambos                                     | 32,7 %                       |
| <b>Comunidad autónoma</b>                 |                              |
| Andalucía                                 | 18,0 %                       |
| Aragón                                    | 4,0 %                        |
| Asturias (Principado de)                  | 2,7 %                        |
| Baleares (Illes)                          | 2,7 %                        |
| Canarias                                  | 5,3 %                        |
| Cantabria                                 | 1,3 %                        |
| Castilla y León                           | 4,0 %                        |

|                                                                                       |                    |                     |                     |                    |
|---------------------------------------------------------------------------------------|--------------------|---------------------|---------------------|--------------------|
| Castilla-La Mancha                                                                    | 6,0 %              |                     |                     |                    |
| Cataluña                                                                              | 14,0 %             |                     |                     |                    |
| Comunidad Valenciana                                                                  | 10,7 %             |                     |                     |                    |
| Extremadura                                                                           | 2,7 %              |                     |                     |                    |
| Galicia                                                                               | 5,3 %              |                     |                     |                    |
| Madrid (Comunidad de)                                                                 | 13,3 %             |                     |                     |                    |
| Murcia (Región de)                                                                    | 3,3 %              |                     |                     |                    |
| Navarra (Com. Foral de)                                                               | 2,0 %              |                     |                     |                    |
| País Vasco                                                                            | 4,7 %              |                     |                     |                    |
| Rioja (La)                                                                            | 0%                 |                     |                     |                    |
| <b>Pacientes visitados con IC al mes</b>                                              |                    |                     |                     |                    |
| 7-15                                                                                  | 5,3 %              |                     |                     |                    |
| 16-30                                                                                 | 29,3 %             |                     |                     |                    |
| 31-50                                                                                 | 28,7 %             |                     |                     |                    |
| 51-65                                                                                 | 18,7 %             |                     |                     |                    |
| >65                                                                                   | 18,0 %             |                     |                     |                    |
| <b>Distribución de los pacientes con IC visitados al mes</b>                          |                    |                     |                     |                    |
| IC-FEC                                                                                | 41,84 %            |                     |                     |                    |
| IC-FEM                                                                                | 22,97 %            |                     |                     |                    |
| IC-FER                                                                                | 35,19 %            |                     |                     |                    |
| <b>Porcentaje de pacientes con IC-FER atendidos según la clasificación de la NYHA</b> | <b>De 0 a 25 %</b> | <b>De 26 a 50 %</b> | <b>De 51 a 75 %</b> | <b>Más de 75 %</b> |
| Clase I                                                                               | 78,7 %             | 16 %                | 4 %                 | 1,3 %              |
| Clase II                                                                              | 4,0 %              | 42 %                | 49,3 %              | 4,7 %              |
| Clase III                                                                             | 48,7 %             | 42 %                | 9,3 %               | 0 %                |
| Clase IV                                                                              | 92,7 %             | 6,7 %               | 0,7 %               | 0 %                |

\* Los expertos seleccionaron todas las categorías aplicables.

**Tabla S3. Resultados del nivel de consenso conseguido por los expertos tras las dos rondas sobre la definición y percepción del paciente con IC-FER «estable».**

| Definición de IC-FER                                                                                                                                                                                                                                                                                                                                                                                                                                                                                         | % de consenso     | Resultado                           | p (Test de Bowker) |
|--------------------------------------------------------------------------------------------------------------------------------------------------------------------------------------------------------------------------------------------------------------------------------------------------------------------------------------------------------------------------------------------------------------------------------------------------------------------------------------------------------------|-------------------|-------------------------------------|--------------------|
| <b>1)</b> IC-FER: Diagnóstico clínico de IC y FEVI $\leq 40$ %. Siendo la IC un síndrome clínico complejo que resulta de cualquier deterioro estructural o funcional del llenado ventricular o de la eyección de sangre. Las manifestaciones cardinales de la IC son la disnea y la fatiga, que pueden limitar la tolerancia al ejercicio, y la retención de líquidos, que pueden conducir a congestión pulmonar y/o esplácnica y/o edema periférico. (Guías ACA/AHA/HFSA).                                  | 92,7 %            | Consenso en el acuerdo              | NA                 |
| <b>2)</b> IC-FER: Diagnóstico clínico de IC y una FEVI $\leq 40$ %. Siendo la IC un síndrome clínico caracterizado por síntomas típicos (como disnea, inflamación de tobillos y fatiga), que puede ir acompañado de signos (como presión venosa yugular elevada, crepitantes pulmonares y edema periférico) causados por una anomalía cardíaca estructural o funcional que producen una reducción del gasto cardíaco o una elevación de las presiones intracardiacas en reposo o en estrés. (Guía ESC 2016). | 92 %              | Consenso en el acuerdo <sup>†</sup> | 0,783              |
| Definición de paciente IC-FER «estable»                                                                                                                                                                                                                                                                                                                                                                                                                                                                      | % de consenso     | Resultado                           |                    |
| <b>1)</b> En un paciente con IC crónica, el término <i>estabilidad</i> suele hacer referencia a que los síntomas y signos son inexistentes o leves y que no han cambiado recientemente o al menos en el mes anterior, o desde la última visita médica de acuerdo con la práctica clínica.                                                                                                                                                                                                                    | 82 %              | Consenso en el acuerdo <sup>†</sup> | 0,001*             |
| <b>2)</b> Los pacientes con IC a menudo se consideran «clínicamente estables» si están recibiendo tratamiento y no muestran signos y síntomas físicos que sugieran un empeoramiento de la función cardíaca en al menos el último mes.                                                                                                                                                                                                                                                                        | 68,7 % en acuerdo | Indeterminado                       | 0,229              |
| <b>3)</b> Un paciente con IC «estable» se define como paciente con IC crónica cuya enfermedad no ha empeorado, la medicación para la IC no ha cambiado y no ha sido hospitalizado por IC.                                                                                                                                                                                                                                                                                                                    | 55,3 % en acuerdo | Indeterminado                       | 0,845              |
| IC-FER «estable» y práctica clínica habitual actual                                                                                                                                                                                                                                                                                                                                                                                                                                                          | % de consenso     | Resultado                           |                    |
| <b>1)</b> La naturaleza silenciosa pero progresiva de la IC-FER puede contribuir a aumentar el riesgo de muerte en pacientes que son asintomáticos o sólo ligeramente sintomáticos.                                                                                                                                                                                                                                                                                                                          | 96 %              | Consenso en el acuerdo              | NA                 |
| <b>2)</b> Las calculadoras de riesgo desarrolladas recientemente tienen en cuenta los tratamientos de última generación y los niveles de biomarcadores y revelan que no existe una IC verdaderamente estable.                                                                                                                                                                                                                                                                                                | 71,3 %            | Consenso en el acuerdo <sup>†</sup> | 0,909              |
| <b>3)</b> La IC-FER es un trastorno progresivo por el cual la estructura y la función cardíaca continúan                                                                                                                                                                                                                                                                                                                                                                                                     | 70,7 %            | Consenso en                         | NA                 |

|                                                                                                                                                                                                              |                      |                                        |        |
|--------------------------------------------------------------------------------------------------------------------------------------------------------------------------------------------------------------|----------------------|----------------------------------------|--------|
| deteriorándose, a menudo a pesar de la ausencia de signos y síntomas clínicamente aparentes de un estado de empeoramiento de la enfermedad.                                                                  |                      | el acuerdo                             |        |
| <b>4)</b> Los pacientes con IC sintomática en algún momento (estadio C de la clasificación ACC/AHA) que no presenten síntomas y signos durante la visita clínica no tienen un riesgo considerable de muerte. | 95,3 %               | Consenso en el desacuerdo              | NA     |
| <b>5)</b> La naturaleza silenciosa pero progresiva de la IC-FER no contribuye a aumentar el riesgo de muerte en pacientes que son «clínicamente estables».                                                   | 94 %                 | Consenso en el desacuerdo              | NA     |
| <b>6)</b> El número de hospitalizaciones no se reducen si el paciente con IC-FER tiene un tratamiento optimizado.                                                                                            | 92,7 %               | Consenso en el desacuerdo              | NA     |
| <b>7)</b> El paciente con IC-FER «estable» es excepcional que tenga ingresos hospitalarios a corto/medio plazo.                                                                                              | 70,7 %               | Consenso en el desacuerdo <sup>†</sup> | 0,186  |
| <b>8)</b> Los pacientes con clases 1 y 2 de la NYHA presentan el riesgo más bajo de sufrir muerte súbita cardíaca.                                                                                           | 62,7 % en desacuerdo | Indeterminado                          | 0,004* |
| <b>9)</b> El paciente con IC-FER «estable», independientemente de si presenta alguna descompensación, tiene un alto riesgo de hospitalizaciones.                                                             | 61,9 % en acuerdo    | Indeterminado                          | 0,111  |
| <b>10)</b> Un paciente con IC-FER «estable» que está en tratamiento con diuréticos es un indicador de alto riesgo.                                                                                           | 34,7 % en acuerdo    | Indeterminado                          | 0,323  |

<sup>†</sup> Preguntas que alcanzaron el consenso en la segunda ronda de votación.

ACC/AHA: American College of Cardiology/American Heart Association. FEVI: fracción de eyección del ventrículo izquierdo. IC: Insuficiencia cardíaca. IC-FER: insuficiencia cardíaca con fracción de eyección reducida. NA: no aplicable. NYHA: New York Heart Association. \*p <0,05



**Tabla S4. Resultados del nivel de consenso conseguido por los expertos tras las dos rondas sobre el manejo del paciente con IC-FER «estable».**

| <b>Evaluación y seguimiento del paciente con IC-FER «estable» en la práctica clínica habitual actual</b>                                                                        | <b>% de consenso</b> | <b>Resultado</b>       | <b>p (Test de Bowker)</b> |
|---------------------------------------------------------------------------------------------------------------------------------------------------------------------------------|----------------------|------------------------|---------------------------|
| <b>1)</b> En el seguimiento del paciente con IC-FER «estable» debe existir una colaboración total entre el cardiólogo y el médico de atención primaria.                         | 99,3 %               | Consenso en el acuerdo | NA                        |
| <b>2)</b> El papel de enfermería es clave para fomentar la adherencia al tratamiento.                                                                                           | 96,7 %               | Consenso en el acuerdo | NA                        |
| <b>3)</b> Disponer de una unidad de IC de referencia puede ser de utilidad en el manejo del paciente con IC-FER                                                                 | 94,7 %               | Consenso en el acuerdo | NA                        |
| <b>4)</b> El paciente con IC-FER de difícil control debe ser seguido en una unidad de IC.                                                                                       | 94,0 %               | Consenso en el acuerdo | NA                        |
| <b>5)</b> La clase funcional puede ser igual pero la IC-FER «estable» puede progresar.                                                                                          | 94,0 %               | Consenso en el acuerdo | NA                        |
| <b>6)</b> Disponer de una unidad de cuidados paliativos puede ser de utilidad en el manejo del paciente con IC-FER.                                                             | 92,7 %               | Consenso en el acuerdo | NA                        |
| <b>7)</b> En el manejo óptimo del paciente con IC-FER «estable» el médico de atención primaria es indispensable.                                                                | 92,0 %               | Consenso en el acuerdo | NA                        |
| <b>8)</b> Para evaluar la progresión del paciente con IC-FER «estable» no basta solo con evaluar los signos y síntomas clínicos.                                                | 91,3 %               | Consenso en el acuerdo | NA                        |
| <b>9)</b> El papel de enfermería es clave para detectar si los signos o síntomas de la IC-FER interfieren en la vida diaria del paciente.                                       | 90,7 %               | Consenso en el acuerdo | NA                        |
| <b>10)</b> En consulta, al paciente con IC-FER «estable» se debe consultar específicamente por cada signo y síntoma y su afectación a su calidad de vida.                       | 88,0 %               | Consenso en el acuerdo | NA                        |
| <b>11)</b> El paciente con IC-FER «estable» debe examinarse al menos cada 6 meses para evaluar si su enfermedad ha empeorado, si deberían cambiar de medicación o si se debería | 84,7 %               | Consenso en el acuerdo | NA                        |

|                                                                                                                                                                                       |                   |                                        |        |
|---------------------------------------------------------------------------------------------------------------------------------------------------------------------------------------|-------------------|----------------------------------------|--------|
| considerar otro tipo de procedimientos.                                                                                                                                               |                   |                                        |        |
| <b>12)</b> El papel de enfermería es clave para detectar la necesidad de un cambio de tratamiento.                                                                                    | 82,0 %            | Consenso en el acuerdo                 | NA     |
| <b>13)</b> La necesidad de añadir o aumentar la dosis de un diurético de ASA indica que el paciente deja de ser estable.                                                              | 80,0 %            | Consenso en el acuerdo                 | NA     |
| <b>14)</b> En consulta no es necesario valorar si el paciente con IC-FER «estable» adapta su vida a medida que va reduciendo su capacidad física.                                     | 96,7 %            | Consenso en el desacuerdo              | NA     |
| <b>15)</b> La resonancia magnética de corazón es una técnica imprescindible para evaluar si existe progresión de la IC-FER «estable».                                                 | 85,3 %            | Consenso en el desacuerdo <sup>†</sup> | 0,007* |
| <b>16)</b> El médico de atención primaria no puede hacer un seguimiento riguroso ni detectar la progresión de la IC-FER «estable».                                                    | 84,7 %            | Consenso en el desacuerdo              | NA     |
| <b>17)</b> Para evaluar la progresión del paciente con IC-FER «estable» no es necesario medir los niveles de biomarcadores, tales como péptidos natriuréticos.                        | 76,7 %            | Consenso en el desacuerdo              | NA     |
| <b>18)</b> Cualquier paciente con insuficiencia cardíaca debe ser seguido en una unidad de insuficiencia cardíaca.                                                                    | 74,0 %            | Consenso en el desacuerdo              | NA     |
| <b>19)</b> La clasificación funcional de la escala NYHA es una valoración objetiva.                                                                                                   | 73,3 %            | Consenso en el desacuerdo              | NA     |
| <b>20)</b> El test de los 6 minutos es de gran utilidad en la valoración clínica de los pacientes con insuficiencia cardíaca.                                                         | 66,7 % en acuerdo | Indeterminado                          | 0,873  |
| <b>21)</b> La concordancia respecto a la clase funcional de la NYHA basada en lo indicado por el médico y el paciente es inferior al 50 %.                                            | 58,0 % en acuerdo | Indeterminado                          | 0,000* |
| <b>22)</b> Para evaluar la progresión del paciente con IC-FER «estable» es necesario evaluar la persistencia o empeoramiento de disfunción sistólica severa del ventrículo izquierdo. | 54,7 % en acuerdo | Indeterminado                          | 0,279  |
| <b>23)</b> Para evaluar la progresión del paciente con IC-FER «estable» es necesario medir la fracción de eyección.                                                                   | 49,3 % en acuerdo | Indeterminado                          | 0,411  |

|                                                                                                                                                                 |                      |                           |       |
|-----------------------------------------------------------------------------------------------------------------------------------------------------------------|----------------------|---------------------------|-------|
| <b>24)</b> El paciente con IC-FER «estable» puede ser seguido en atención primaria sin necesidad de ser visitado regularmente por un cardiólogo.                | 59,3 % en desacuerdo | Indeterminado             | 0,219 |
| <b>Tratamiento del paciente con IC-FER «estable» en la práctica clínica habitual actual</b>                                                                     | <b>% de consenso</b> | <b>Resultado</b>          |       |
| <b>1)</b> En cada visita, es primordial valorar la adherencia al tratamiento del paciente con IC-FER «estable».                                                 | 98,7 %               | Consenso en el acuerdo    | NA    |
| <b>2)</b> Independientemente de que el paciente con IC-FER se mantenga en la misma clase funcional el tratamiento farmacológico debe optimizarse.               | 98,7 %               | Consenso en el acuerdo    | NA    |
| <b>3)</b> La terapia médica del paciente con IC-FER «estable» puede optimizarse con los nuevos avances científicos.                                             | 95,3 %               | Consenso en el acuerdo    | NA    |
| <b>4)</b> La incorporación de nuevos fármacos en pacientes menos sintomáticos puede enlentecer la progresión subclínica de la enfermedad.                       | 95,3 %               | Consenso en el acuerdo    | NA    |
| <b>5)</b> Si el paciente con IC-FER presenta signos o síntomas leves persistentes que afectan su calidad de vida es necesario valorar un cambio de tratamiento. | 95,3 %               | Consenso en el acuerdo    | NA    |
| <b>6)</b> Independientemente de que el paciente con IC-FER esté «estable» el tratamiento farmacológico debe titularse a dosis objetivo.                         | 94,7 %               | Consenso en el acuerdo    | NA    |
| <b>7)</b> En caso que el paciente con IC-FER se mantuviera sintomático a pesar de las dosis máximas toleradas sería necesario cambiar de tratamiento.           | 84,0 %               | Consenso en el acuerdo    | NA    |
| <b>8)</b> La necesidad de añadir o aumentar un diurético indica que el paciente deja de estar estable.                                                          | 79,3 %               | Consenso en el acuerdo    | NA    |
| <b>9)</b> El cambio de un IECA o un ARA II a un INRA no debe reservarse hasta que aparezca una descompensación clínica.                                         | 71,3 %               | Consenso en el acuerdo    | NA    |
| <b>10)</b> El tratamiento del paciente con IC-FER «estable» con INRA sólo está justificado cuando hay un empeoramiento de la clase funcional.                   | 90,7 %               | Consenso en el desacuerdo | NA    |
| <b>11)</b> Si el paciente con IC-FER presenta signos o síntomas leves persistentes no es necesario valorar un cambio de tratamiento.                            | 88,0 %               | Consenso en el desacuerdo | NA    |
| <b>12)</b> Optimizar el tratamiento es exclusivamente titular a dosis máxima tolerada.                                                                          | 74,7 %               | Consenso en el desacuerdo | NA    |
| <b>13)</b> Si el paciente con IC-FER no presenta signos o síntomas no es necesario valorar un cambio de tratamiento.                                            | 74,7 %               | Consenso en el desacuerdo | NA    |

|                                                                                                                                             |                      |                            |        |
|---------------------------------------------------------------------------------------------------------------------------------------------|----------------------|----------------------------|--------|
| <b>14)</b> Las diferentes comorbilidades que puede padecer el paciente con IC-FER «estable» no limitan el tratamiento idóneo.               | 72,7 %               | Consenso en el desacuerdo  | NA     |
| <b>15)</b> En el tratamiento del paciente con IC-FER «estable» debe primar la experiencia a las recomendaciones de las guías.               | 70,0 %               | Consenso en el desacuerdo† | 0,029* |
| <b>Abordaje en consulta del paciente con IC-FER «estable» en la práctica clínica habitual actual</b>                                        | <b>% de consenso</b> | <b>Resultado</b>           |        |
| <b>1)</b> Preguntar específicamente sobre si el paciente con IC-FER «estable» siente más o menos fatiga que la visita anterior.             | 96,7 %               | Consenso en el acuerdo     | NA     |
| <b>2)</b> Sondear específicamente sobre si el paciente con IC-FER «estable» ha reducido su actividad o ha dejado de hacer alguna actividad. | 95,3 %               | Consenso en el acuerdo     | NA     |
| <b>3)</b> Preguntar específicamente sobre si el paciente con IC-FER «estable» se ahoga más o menos por la noche que la visita anterior.     | 95,3 %               | Consenso en el acuerdo     | NA     |
| <b>4)</b> Consultar específicamente sobre si el paciente con IC-FER «estable» se cansa más o menos que la visita anterior.                  | 94,0 %               | Consenso en el acuerdo     | NA     |
| <b>5)</b> Consultar específicamente sobre si el paciente con IC-FER «estable» ha retenido líquidos.                                         | 92,7 %               | Consenso en el acuerdo     | NA     |
| <b>Recomendaciones de abordaje en el paciente con IC-FER «estable». en la práctica clínica habitual</b>                                     | <b>% de consenso</b> | <b>Resultado</b>           |        |
| <b>1)</b> Fomentar y comprobar la adherencia al tratamiento.                                                                                | 100,0 %              | Consenso en el acuerdo     | NA     |
| <b>2)</b> Revisar la necesidad de modificar el tratamiento.                                                                                 | 98,7 %               | Consenso en el acuerdo     | NA     |
| <b>3)</b> Recomendar control de peso, si procediera.                                                                                        | 96,0 %               | Consenso en el acuerdo     | NA     |
| <b>4)</b> Promover hábitos saludables con medidas de autocuidado (presión arterial y frecuencia cardíaca).                                  | 96,0 %               | Consenso en el acuerdo     | NA     |
| <b>5)</b> Estimular la actividad física adecuada al paciente con IC.                                                                        | 94,7 %               | Consenso en el acuerdo     | NA     |
| <b>6)</b> Recomendar vacunación antigripal anual.                                                                                           | 90,7 %               | Consenso en el acuerdo     | NA     |
| <b>7)</b> Recomendar vacunación antineumocócica.                                                                                            | 86,0 %               | Consenso en el             | NA     |

|  |  |         |  |
|--|--|---------|--|
|  |  | acuerdo |  |
|--|--|---------|--|

† Preguntas que alcanzaron el consenso en la segunda ronda de votación.

ACC/AHA: American College of Cardiology/American Heart Association. ARA II: antagonistas del receptor de la angiotensina II. IC: Insuficiencia cardiaca. IC-FER: insuficiencia cardiaca con fracción de eyección reducida. IECA: inhibidor de la enzima de conversión de la angiotensina. INRA: inhibidor de la neprilina y del receptor de la angiotensina. NA: no aplicable. NYHA: New York Heart Association. \*p <0,05

**Tabla S5. Resultados del nivel de consenso conseguido por los expertos tras las dos rondas sobre las recomendaciones para optimizar el manejo y seguimiento del paciente con IC-FER «estable».**

| <b>Recomendaciones basadas en la experiencia clínica en pacientes con IC-FER «estable»</b>                                                  | <b>% de consenso</b> | <b>Resultado</b>       | <b>p (Test de Bowker)</b> |
|---------------------------------------------------------------------------------------------------------------------------------------------|----------------------|------------------------|---------------------------|
| <b>1)</b> Es necesario concienciar sobre la necesidad de la optimización del tratamiento del paciente con IC-FER «estable».                 | 100 %                | Consenso en el acuerdo | NA                        |
| <b>2)</b> El profesional sanitario debe estar al día de los últimos avances terapéuticos.                                                   | 100 %                | Consenso en el acuerdo | NA                        |
| <b>3)</b> Es necesario concienciar sobre la progresión de la IC-FER «estable».                                                              | 99,3 %               | Consenso en el acuerdo | NA                        |
| <b>4)</b> Se debe promover la continuidad asistencial y la coordinación entre cardiología y atención primaria.                              | 99,3 %               | Consenso en el acuerdo | NA                        |
| <b>5)</b> El profesional sanitario debe contar con herramientas útiles de evaluación de progresión de la IC-FER.                            | 99,3 %               | Consenso en el acuerdo | NA                        |
| <b>6)</b> Se debe formar al profesional sanitario en relación a la identificación de la progresión de la IC-FER.                            | 99,3 %               | Consenso en el acuerdo | NA                        |
| <b>7)</b> Se debe formar al paciente en la importancia de la adherencia al tratamiento para la IC-FER.                                      | 99,3 %               | Consenso en el acuerdo | NA                        |
| <b>8)</b> Es necesario sensibilizar al profesional sanitario sobre el seguimiento de las guías de manejo del paciente con IC-FER «estable». | 98,0 %               | Consenso en el acuerdo | NA                        |
| <b>9)</b> La entrevista clínica entre el profesional sanitario y el paciente con IC-FER debería estar protocolizada.                        | 77,3 %               | Consenso en el acuerdo | NA                        |

IC-FER: insuficiencia cardiaca con fracción de eyección reducida. NA: no aplicable.
